# Supplementary material for: A zebrafish stable model of Galectin-3 to elucidate its role in Arrhythmogenic Cardiomyopathy
Source: Research Square preprint supplement (doi:10.21203/rs.3.rs-7855683/v1), 2025-11-26
Supplement: Supplementary file 1 [file fa356ca60785a06debb1fd19.docx]

**Supplementary Material**

**A zebrafish stable model of Galectin-3 to elucidate its role in Arrhythmogenic Cardiomyopathy**

Giovanni Risato1,2†, Rudy Celeghin1†, Marco Cason1, Maria Bueno Marinas1, Serena Pinci1, Raquel Brañas Casas2, Monica de Gaspari1, Mila Della Barbera1, Nicola Facchinello3,4, Stefania Rizzo1, Francesco Argenton2, Gaetano Thiene1, Barbara Bauce1, Cristina Basso1, Natascia Tiso 2*, Kalliopi Pilichou1*

1Department of Cardiac-Thoracic-Vascular Sciences and Public Health, University of Padova, Padova, 35128, Italy.

2Department of Biology, University of Padova, Padova, 35131, Italy.

3Department of Pharmacy and Biotechnology, University of Bologna, Bologna, 40126, Italy.

4Neuroscience Institute, Italian Research Council (CNR), Padova, 35131, Italy

† These authors contributed equally to this work

* Corresponding authors

**Natascia Tiso, PhD**

Associate Professor of Biology

Dept. of Biology

*University of Padua*
via Ugo Bassi 58/b
35131 Padova, Italy
Phone n. +39 049 8276302

Email [natascia.tiso@unipd.it](mailto:natascia.tiso@unipd.it)

<http://zfin.org/ZDB-PERS-020116-8>

**Kalliopi Pilichou, PhD**

Associate Professor of Genetics

Head of Cardiovascular Genetics Lab

Dept. of Cardiac-Thoracic-Vascular Sciences and Public Health

*University of Padua*

Via A. Gabelli 61

35121 Padova, Italy

Phone n. +39 049 8272293 Email [kalliopi.pilichou@unipd.it](mailto:kalliopi.pilichou@unipd.it)

Supplementary Table 1: List of oligonucleotides for *lgals3* mutant generation and analysis.

The table lists the sgRNA oligos for *lgals3a* and *lgals3b* mutant lines generation (A), the primers for PCR-based genotyping (B), and for gene expression analysis by quantitative Real-Time (RT-PCR) (C).


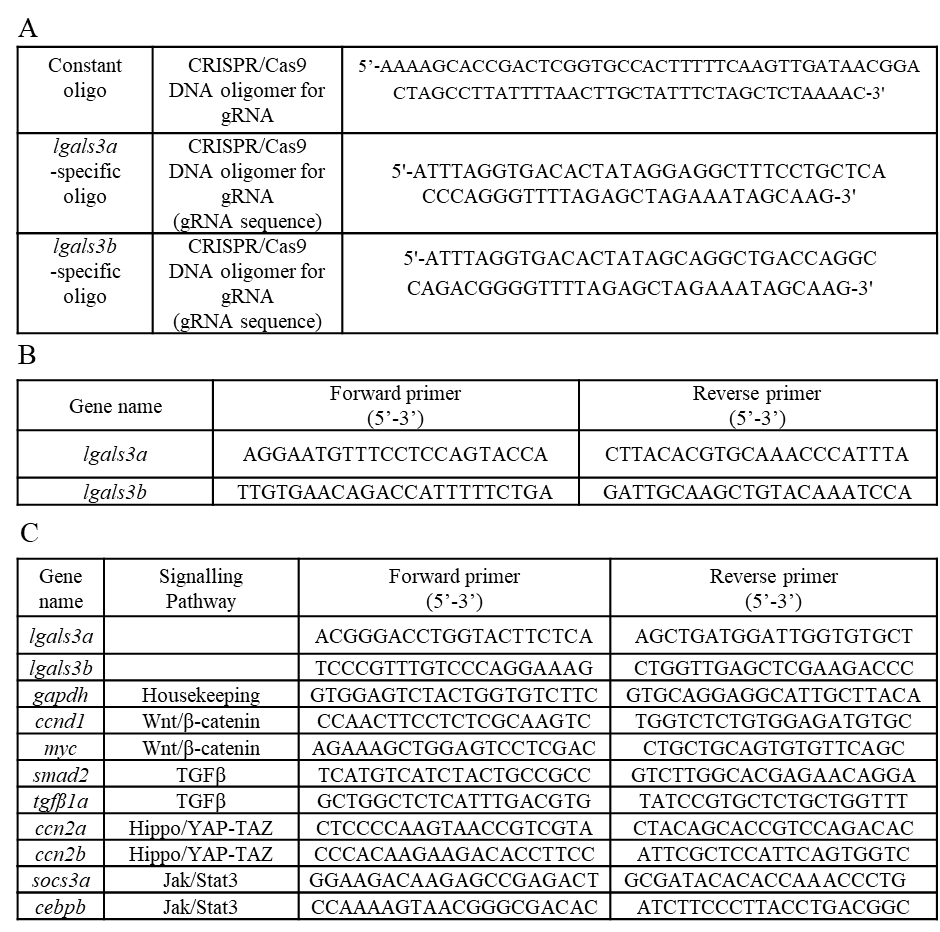


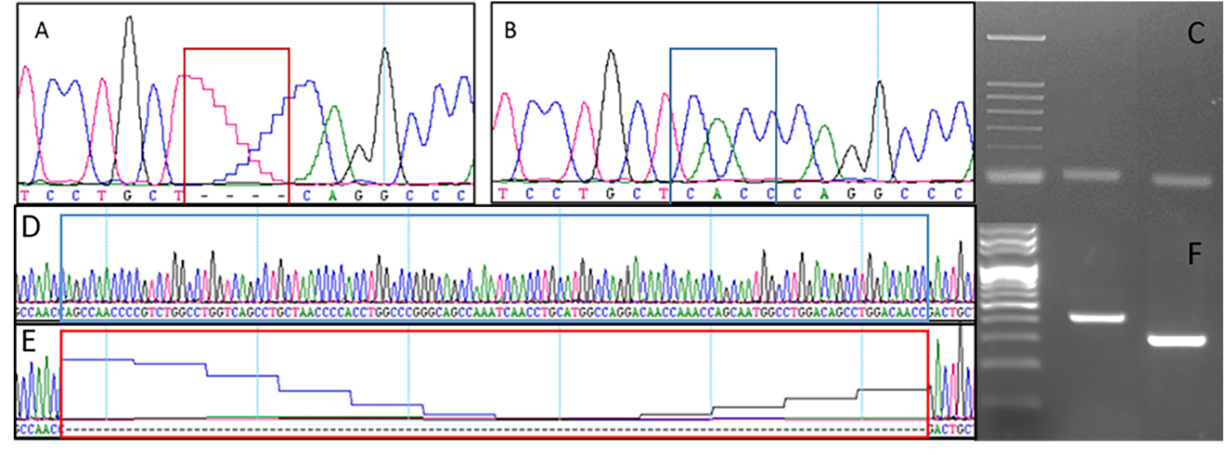


Supplementary Figure 1: Genotyping of *lgals3a* and *lgals3b* zebrafish mutants. A-B-D-E: sequence-based identification of the *lgals3a* 4-nt and *lgals3b* 114-nt deletions (red boxes) in case of homozygous control (B-D) and homozygous mutant (A-E). C- F: gel-based identification of the *lgals3a* (C) and *lgals3b* (F) genotypes; from left to right: size marker, WT control, and homozygous mutant. The C and F panels are photo-compositions of non-adjacent lanes.


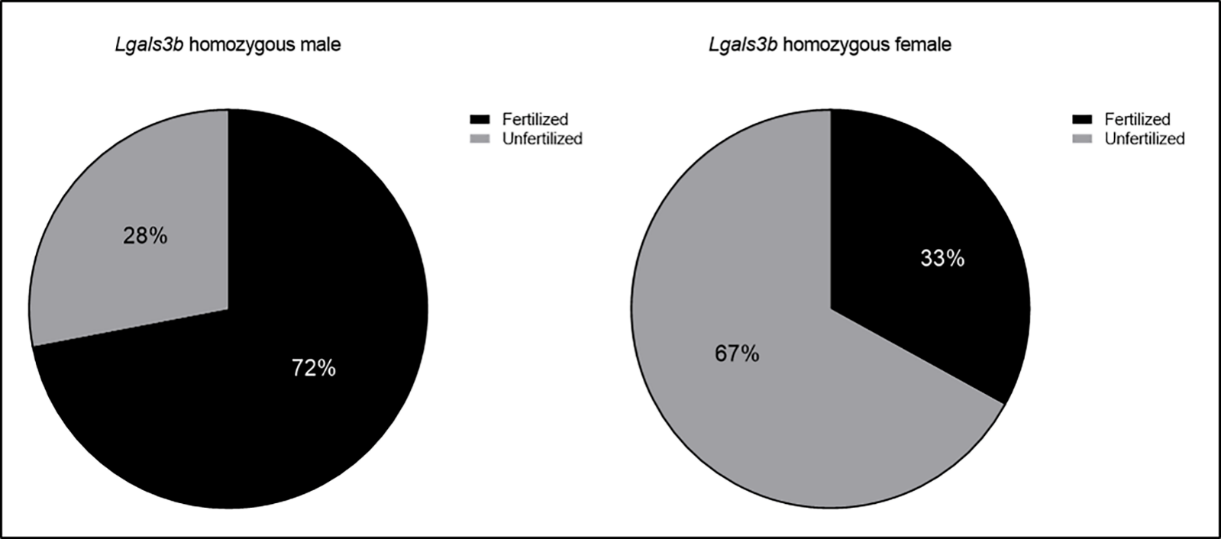


Supplementary Figure 2: Graphical representation of fertility analysis of *lgals3b* homozygous male and female adult zebrafish. Left: *lgals3b* homozygous male fish fertilize 72% of the total eggs. Right: *lgals3b* homozygous female fish may exhibit abnormal ovulation, releasing already degrading eggs; 67% of the obtained eggs resulted unfertilized (n = 100).

Supplementary Figure 3: Decreased survival of zebrafish *lgals3a* (*-aa*) mutants at juvenile stages. One-month survival analysis of mutant lines showed a significant decrease in the survival rate of mutant larvae (p<0.0001), compared to WT. Sample size: n = 100. Test: Log-rank (Mantel-Cox) test.


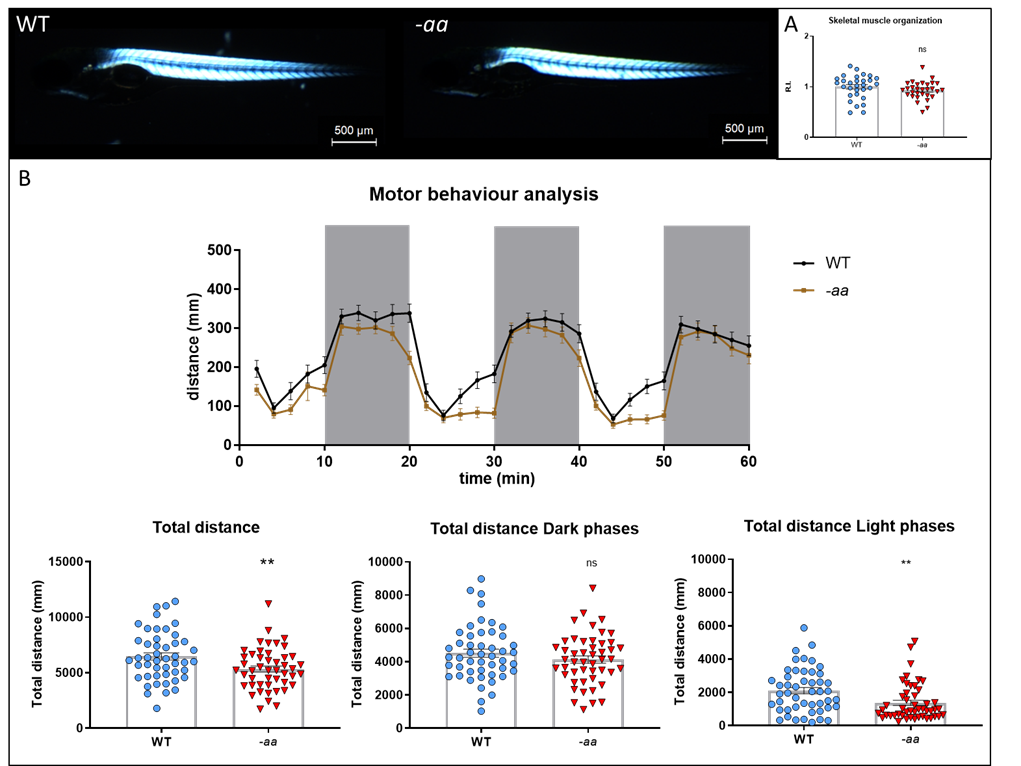


Supplementary Figure 4: Impaired motor behaviour and exercise-induced mortality in zebrafish *lgals3a* (*-aa*) mutant larvae. A-A’-A’’: Birefringence analysis on WT and -*aa* larvae at 5 dpf fails to detect any significant difference in the skeletal muscle structure. Embryos are displayed at 5 dpf, in lateral view, anterior to the left. Sample size: n = 30. R.I.: Relative Intensity. ns = not significant. Test: Unpaired t-test. B-B’: WT and *-aa* larvae at 5 dpf display normal response to light (white areas) and dark (grey areas) stimuli, but with reduced motor performances in the mutants, evaluated as total distance swum. Sample size: n = 47. ** = p<0.01. Test: Unpaired t-test.

Supplementary Figure 5: Signalling pathways dysregulation in *lgals3a* mutants. qPCR analysis detected dysregulation in all the pathways analysed in *lgals3a* mutant larvae. Wnt/β-catenin, Hippo/YAP-TAZ and TGFβ signalling pathway target genes showed a significant downregulation. Each point on the graph corresponds to a pool of 30 embryos of the same genotype. Sample size: n ≈ 15. Log2 FC: Log2 Fold Change. * = p<0.05; ** = p<0.01; *** = p<0.001; **** = p<0.0001. Test: Unpaired t-test.


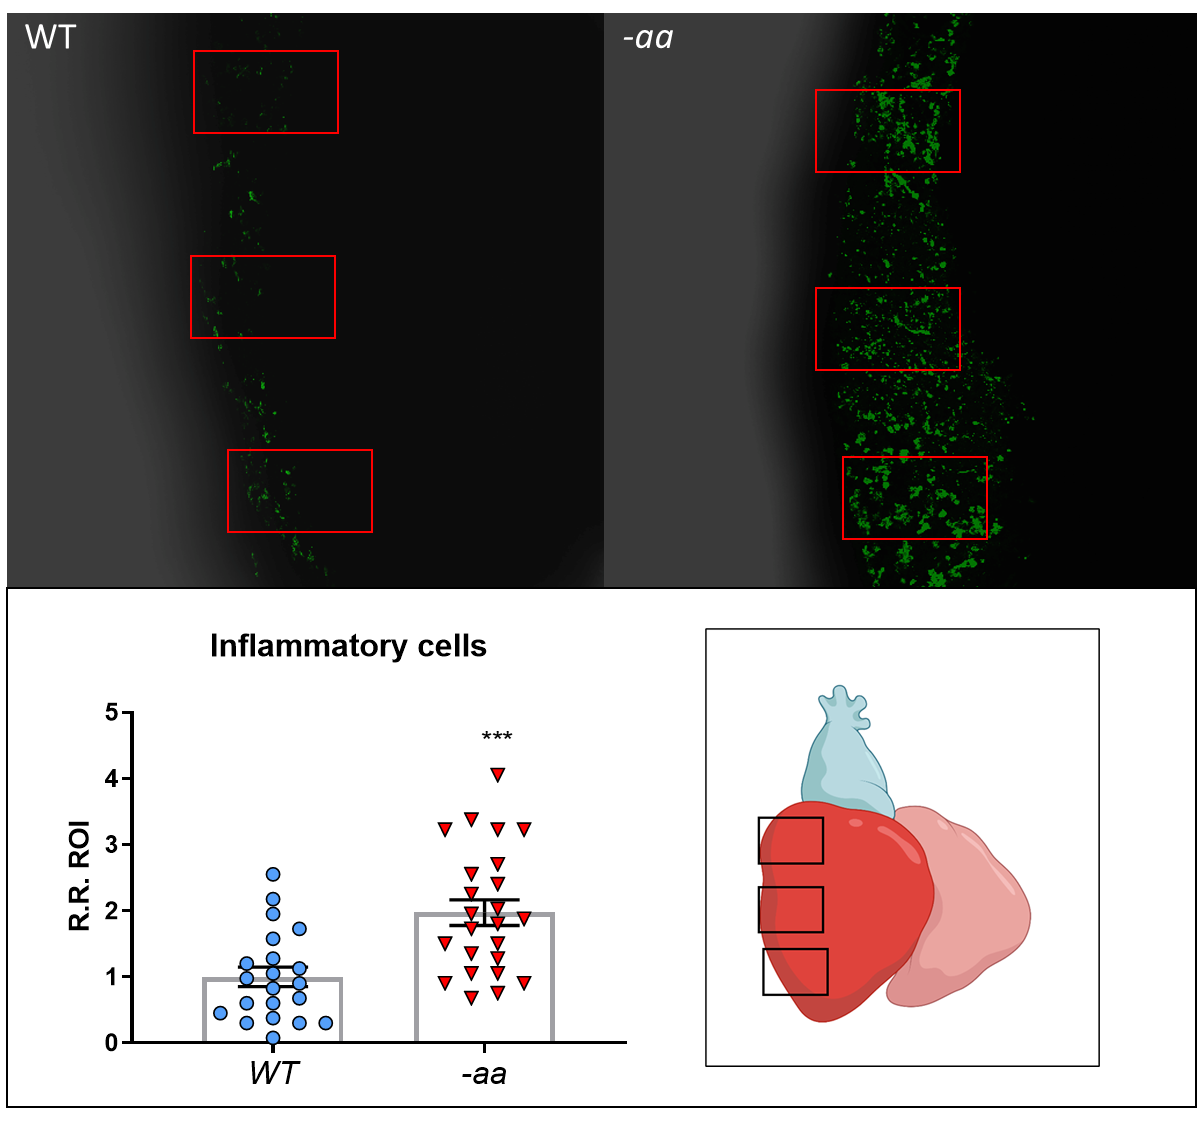


Supplementary figure 6: Inflammatory response in *lgals3a* (*-aa*) mutants. Cells expressing the inflammatory marker L-plastin are significantly more abundant in the epicardial layer of *-aa* mutants (B) compared to WT (A), as shown in the statistical analysis. Sample size: n ≈ 20. *** = p<0.001. Test: Unpaired t-test. Red rectangular boxes indicate ROI. R.R. ROI: Relative Ratio ROI.
